# Supplementary material
Source: Springer Nature journal article supplement (https://www.springermedizin.de/resource/supplementary/13000_2012_585_MOESM1_ESM.pdf/9624980)

# HER2 Gene-Protein Assay Detection

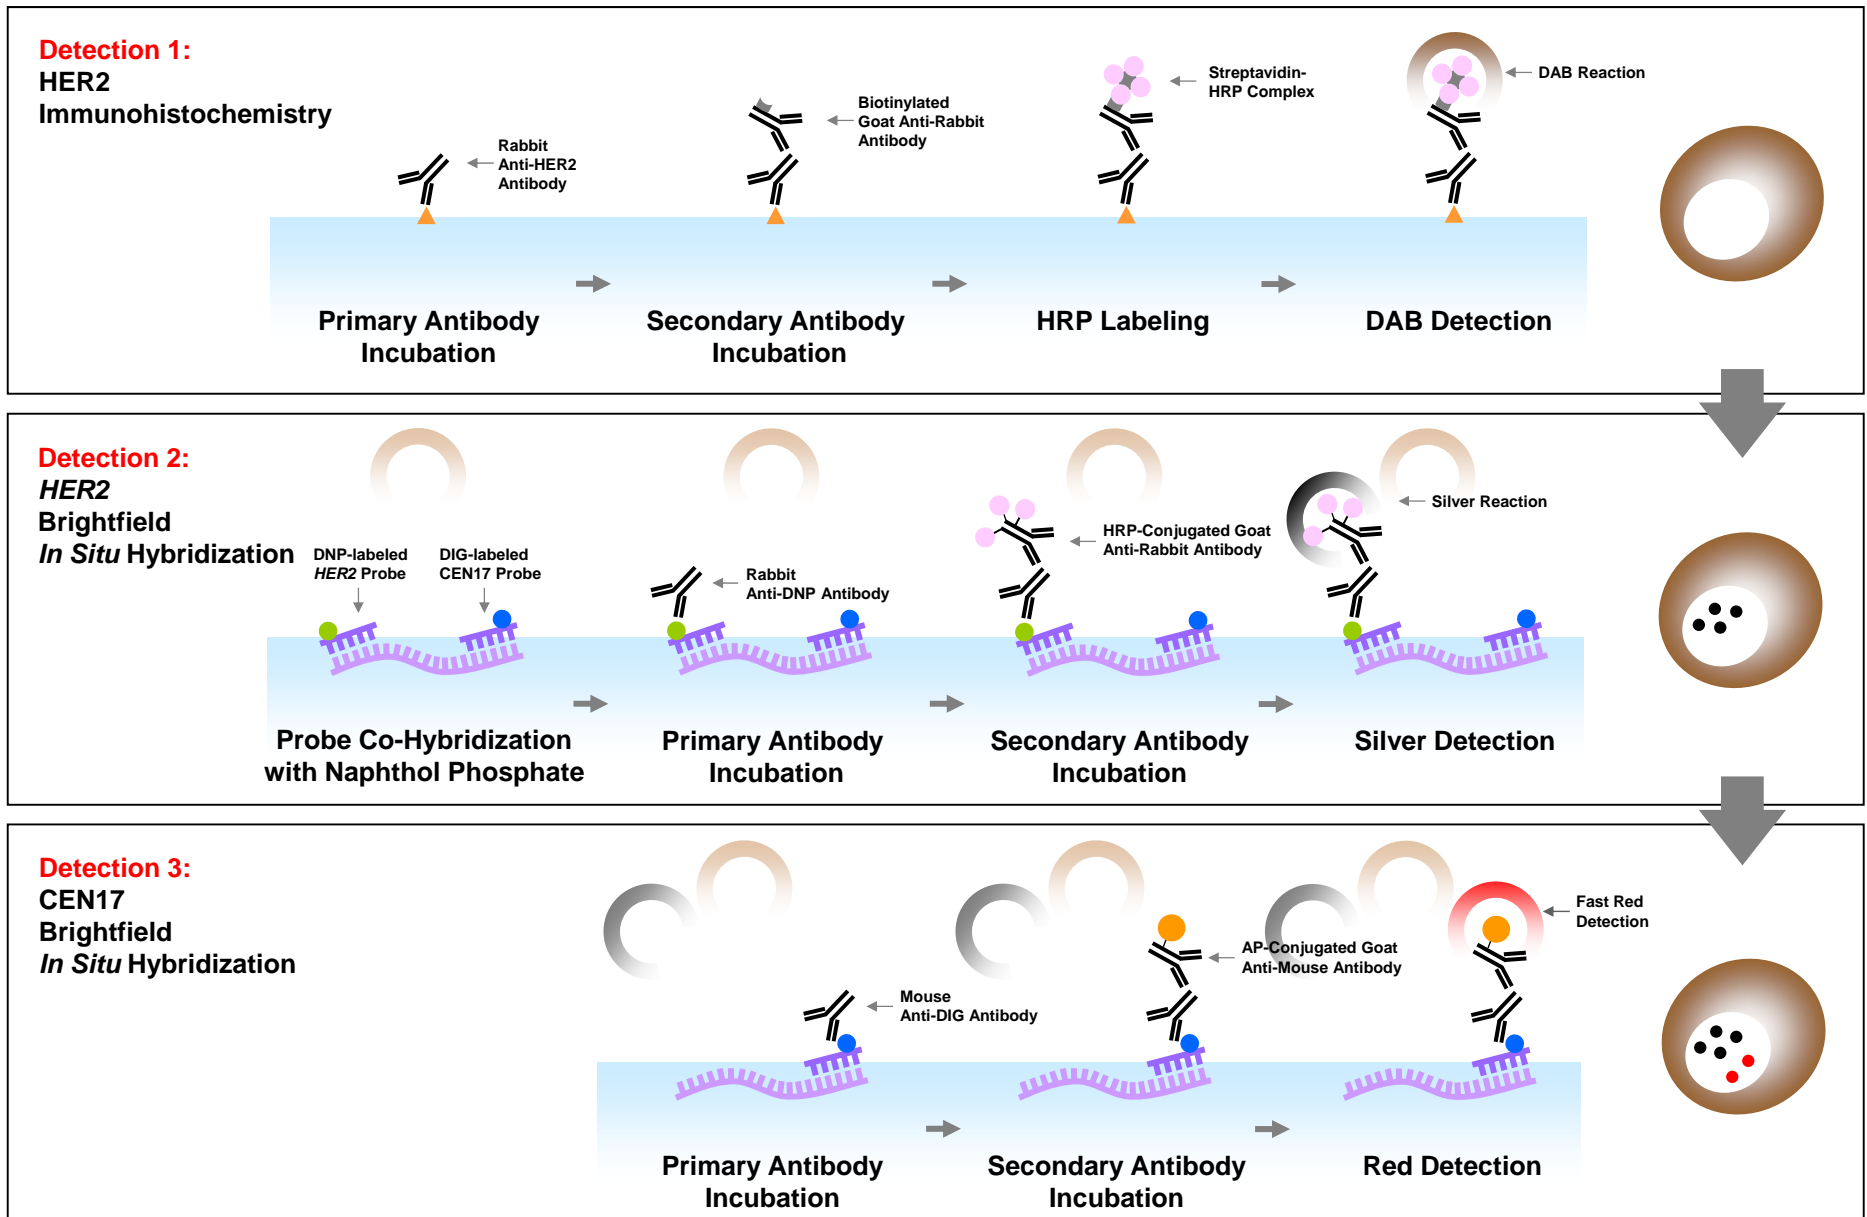

Supplement: MOESM1 [file 9624980]
